# Supplementary material for: How Thioredoxin Dissociates Its Mixed Disulfide
Source: PLoS Comput Biol. 2009 Aug 13;5(8):e1000461. doi: 10.1371/journal.pcbi.1000461 (PMC2714181; doi:10.1371/journal.pcbi.1000461)
Supplement: Text S2 — Description of reactivity (0.03 MB DOC) [file pcbi.1000461.s002.doc]

## Description of reactivity

According to the HSAB principle1 in its local form2, the preferred reactivity between two reaction partners can be extracted from the difference in local softness(*s*) of the interacting sulfur atoms (*s+* and *s-* for the electrophilic and the nucleophilic sulfur atom respectively), which should be minimal for optimal interaction (softness matching procedure).

(1)

The local softness *s* is obtained as

(2)

(3)

*S* is the global softness of the system3 and is given as4:

(4)

with the energy of the highest occupied molecular orbital and the energy of the lowest unoccupied molecular orbital.

*f* is the Fukui function3, condensed to atoms given as:

(Modeling the attack of an electrophile) (5)

(Modeling the attack of a nucleophile) (6)

*qA(N0), qA(N0+1)* and *qA(N0-1)* are the atomic electron populations (in this work, the Natural Population Analysis (NPA) is used) for atom A in the reference molecule (*N0* electrons) and the corresponding anion (*N0* + 1) or cation (*N0* - 1), all evaluated at the molecular geometry of the reference system, as required by the constant external potential ν(***r***).

###

1. Geerlings, P., De Proft, F., and Langenaeker, W. (2003). Conceptual density functional theory. Chem. Rev. *103*, 1793-1874.
2. Yang, W., Parr, R. G. (1985). Hardness, softness, and the Fukui function in the electronic theory of metals and catalysis. Proc. Natl. Acad. Sci. U.S.A. *82*, 6723-6726.
3. Damoun, S., Van dewoude, G., Mendez, F., and Geerlings, P. (1997). Local Softness as a Regioselectivity Indicator in [4+2] Cycloaddition Reactions. J. Phys. Chem. A *101*,886-893.
4. Roos, G., Loverix, S., De Proft, F., Wyns, L. and Geerlings, P. (2003). A computational and conceptual DFT study of the reactivity of anionic compounds: implications for enzymatic catalysis. J. Phys. Chem. A *107*, 6828-6836.
